# Supplementary material for: Effectiveness and cost-effectiveness of fining non-attendance at public hospitals: a randomised controlled trial from Danish outpatient clinics
Source: PubMed Central journal article supplement — BMJ Open. 2018 Apr 13;8(4):e019969. doi: 10.1136/bmjopen-2017-019969 (PMC5988103; doi:10.1136/bmjopen-2017-019969), 2018-04-13
Supplement: bmjopen-2017-019969supp001.pdf [file bmjopen-2017-019969supp001.pdf]

## Appendix 1 | Diagnosis-related group (DRG) tariffs (2017 DKK)

| Type       |                                      | Cost |
|------------|--------------------------------------|------|
| Visits     | Outpatient consultation              | 672  |
|            | Outpatient consultation, extended    | 1361 |
|            | X-ray examination                    | 500  |
|            | X-ray and consultation               | 1172 |
|            | X-ray and extended consultation      | 1861 |
| Procedures | Decompression carpal tunnel syndrome | 2771 |
|            | Minor excision (lipoma etc.)         | 8277 |
